# Supplementary material
Source: publisher figshare collection journal article supplement (https://karger.figshare.com/ndownloader/files/31362829)
Supplement: Supplementary file 1 [file 31362829]

**Supplementary Table 1.** *PNPLA3* I148M (rs738409) associations with ALT, AST, and various liver fibrosis indices in females

| **Phenotype** | **β (SE)#** | **P Value*** | **P Value**** | **P Value***** |
| --- | --- | --- | --- | --- |
| ALT (IU/L) | 4.141 (1.192) | **5.83 x 10-4** | **8.85 x 10-4** | **1.97 x 10-4** |
| AST (IU/L) | 2.3275 (0.813) | **4.47 x 10-3** | **5.02 x 10-3** | **2.65 x 10-3** |
| AST/ALT ratio | -0.0098 (0.033) | NS | NS | NS |
| FIB-4 score | 0.072 (0.027) | **6.79 x 10-3** | **5.43 x 10-3** | **6.90 x 10-3** |
| APRI | 0.0369 (0.0092) | **8.8 x 10-5** | **1.38 x 10-4** | **1.0 x 10-4** |
| NAFLD Fibrosis risk score | 0.1631 (0.0948) | NS | NS | **4.85 x 10-2** |

NS = not significant

Bolded values are significant. β = β coefficients, SE = standard error of the coefficient.

#β (SE) derived from the genotype only model.

*Genotype only in the linear regression model.

**Genotype, age, sex and alcohol status included in the linear regression model.

***Genotype, age, sex, BMI and alcohol status included in the linear regression model.
